# Supplementary material
Source: PubMed Central journal article supplement (PMC4167220)
Supplement: NIHMS603247-supplement-Supp_FigureS1-S5.pdf [file NIHMS603247-supplement-Supp_FigureS1-S5.pdf]

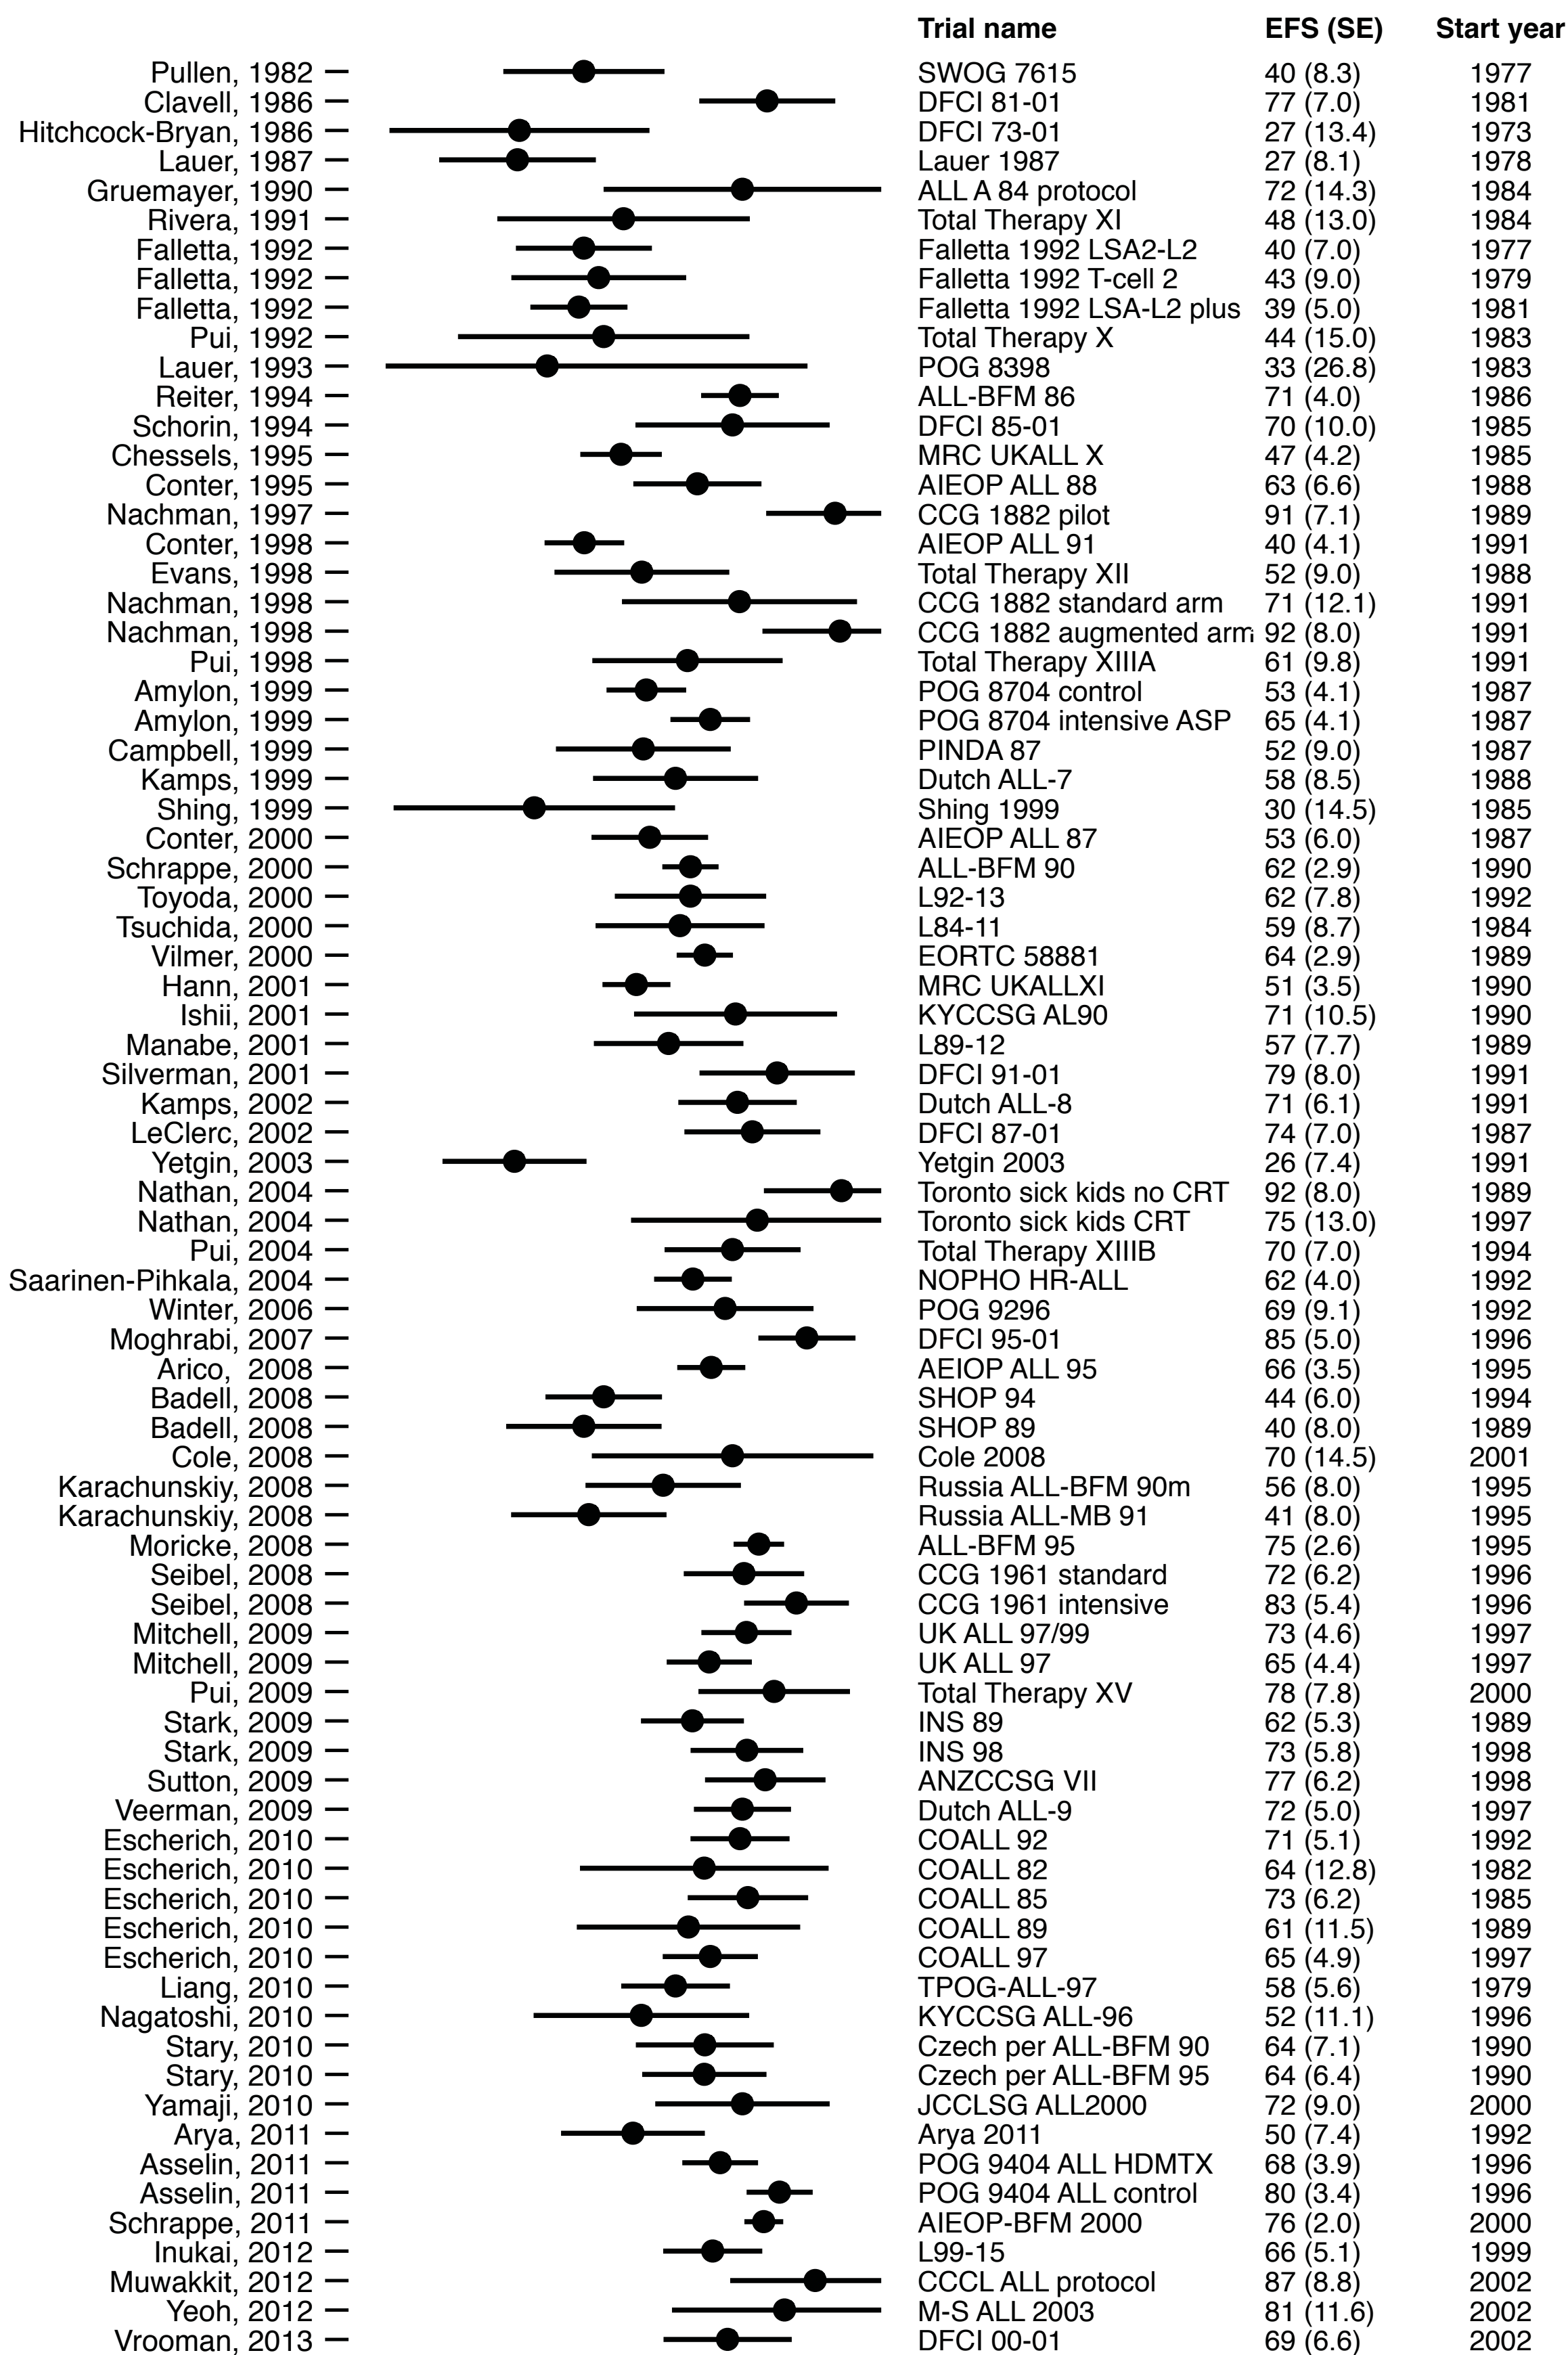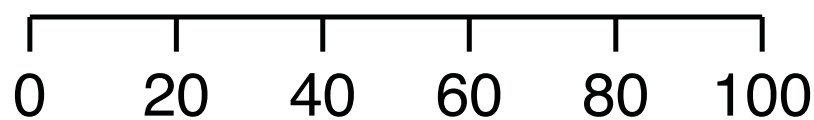

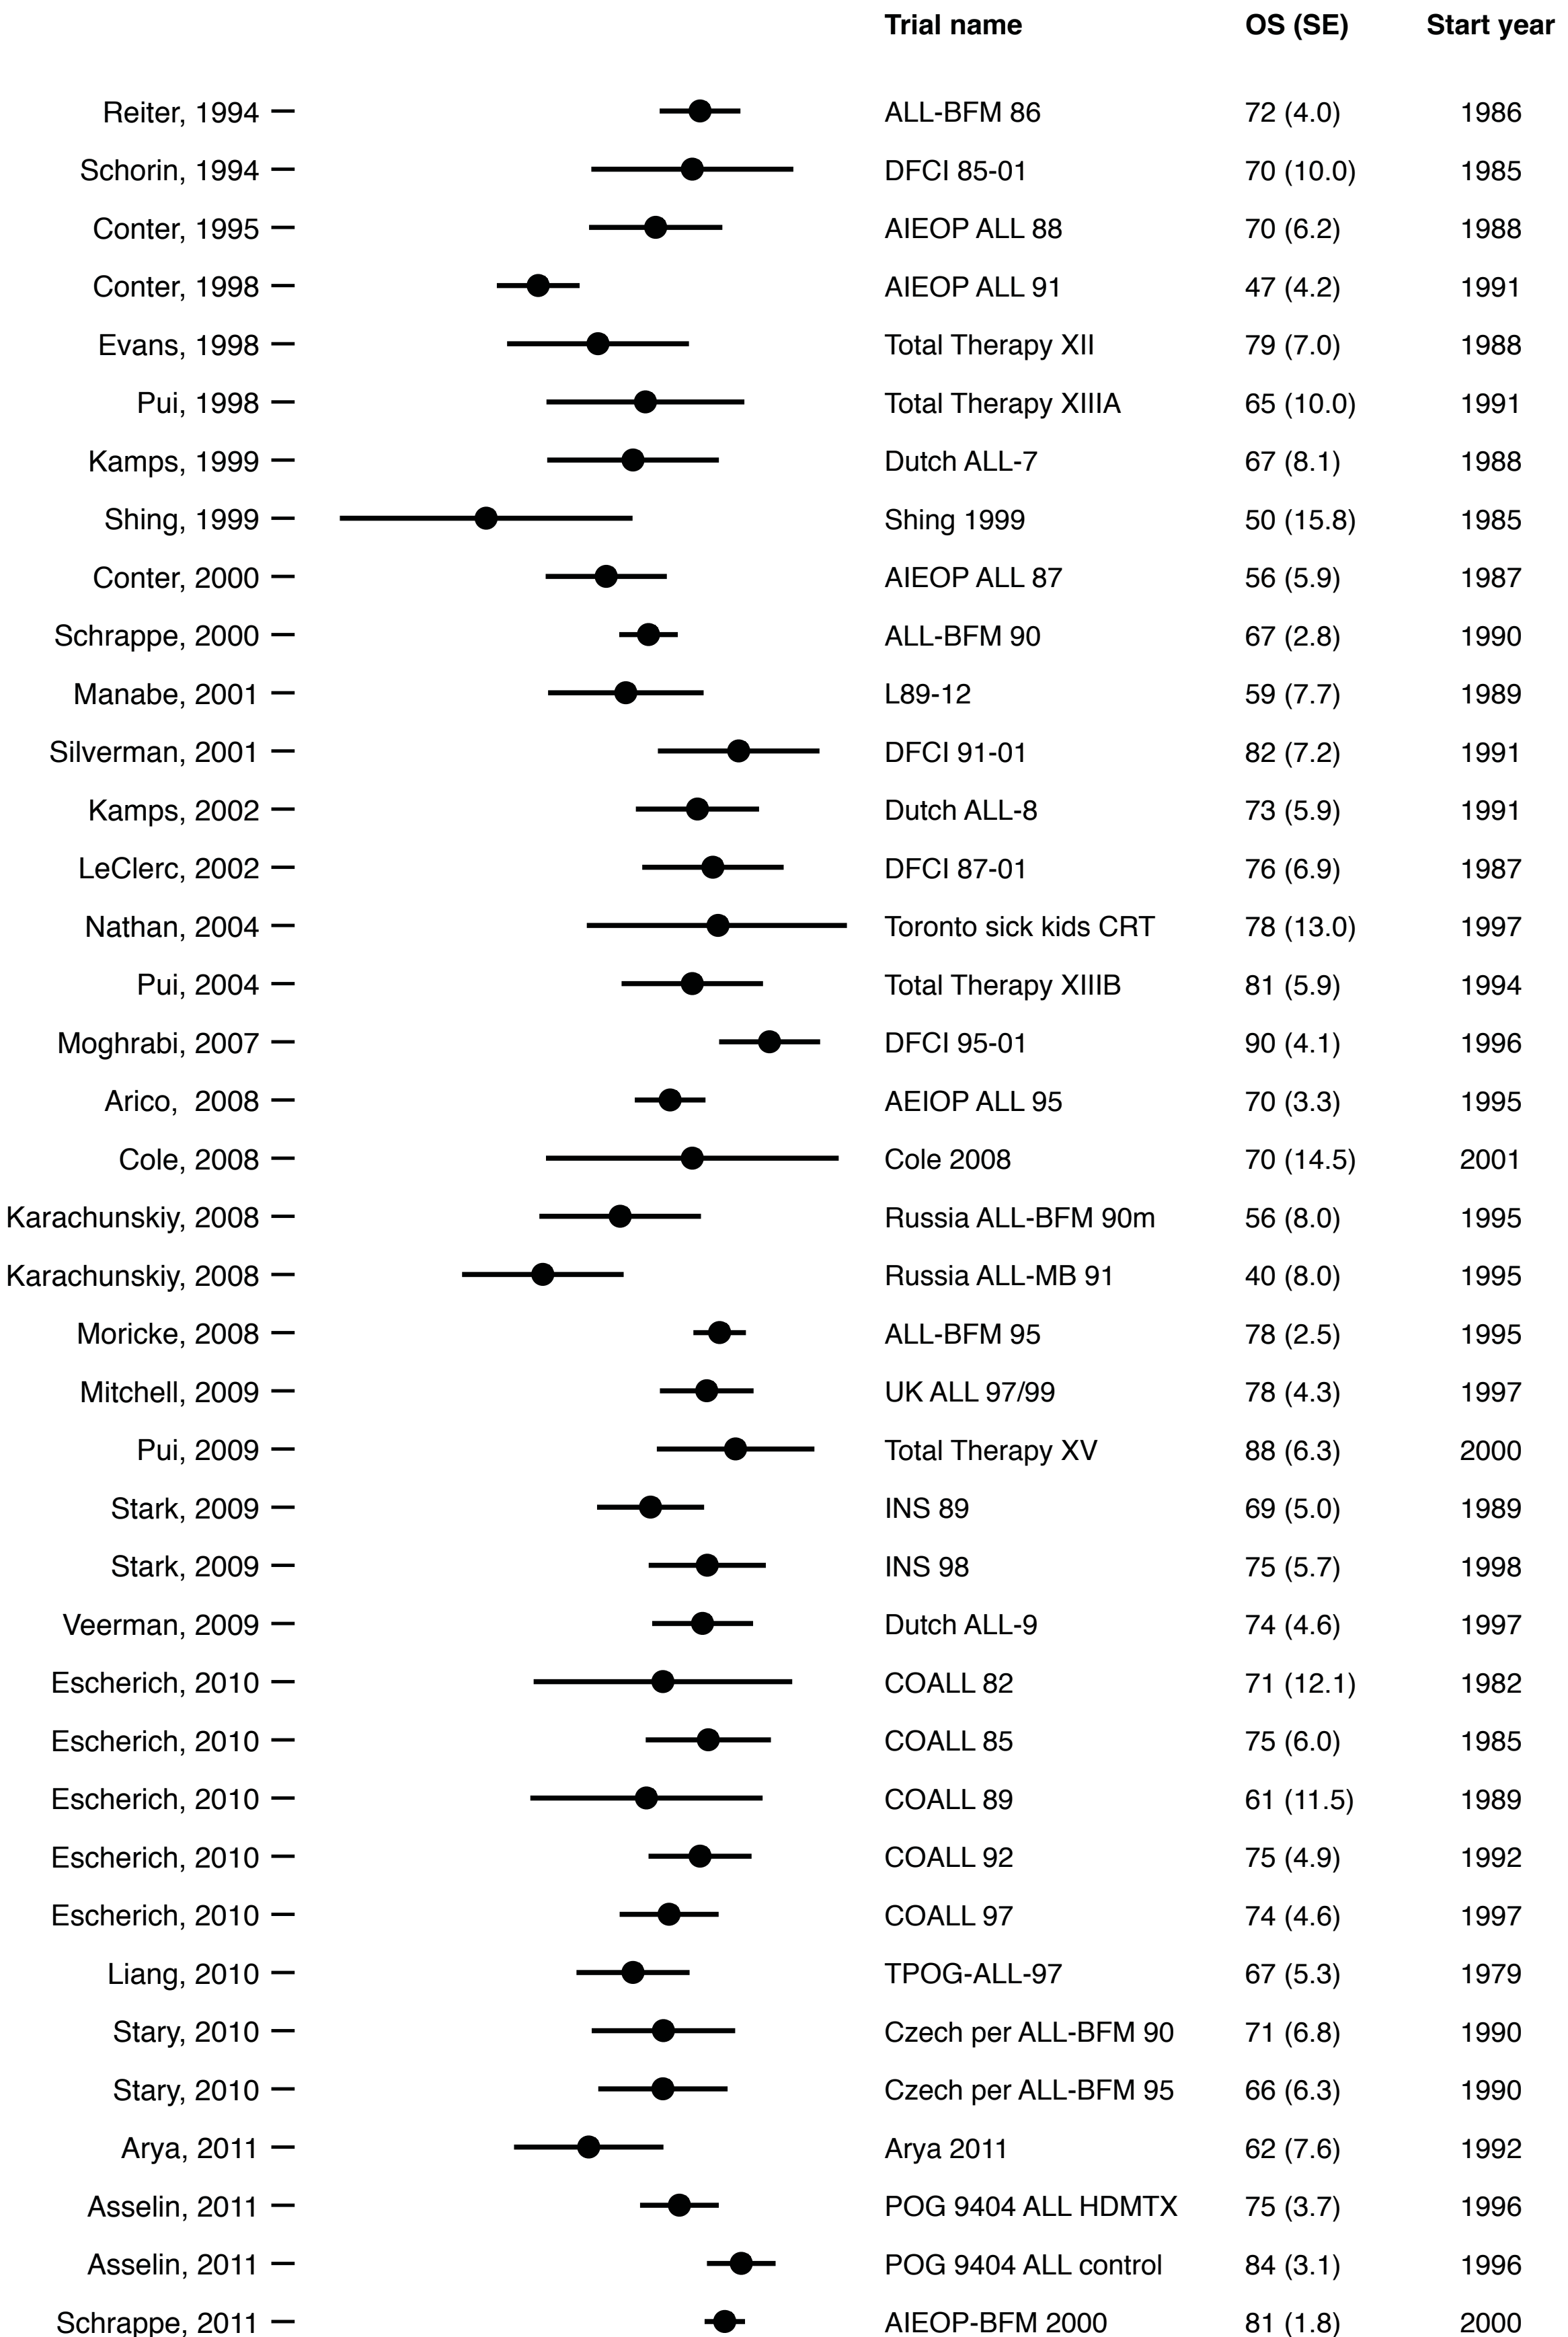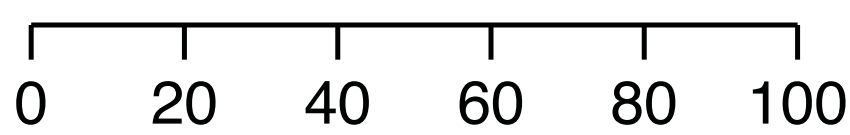

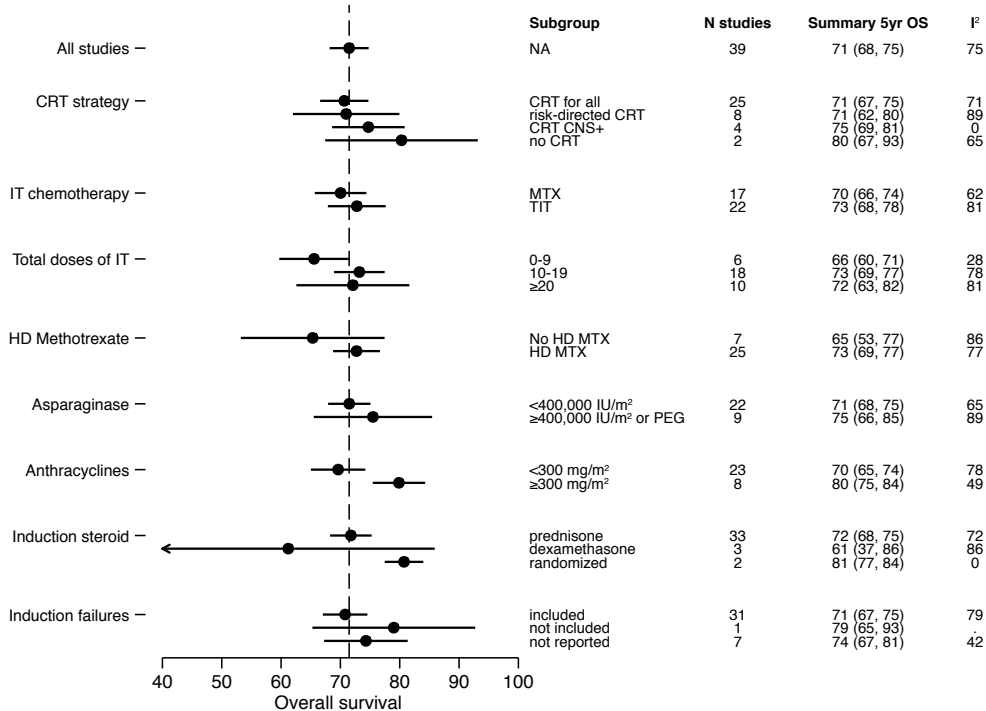

**A. Enrollment start**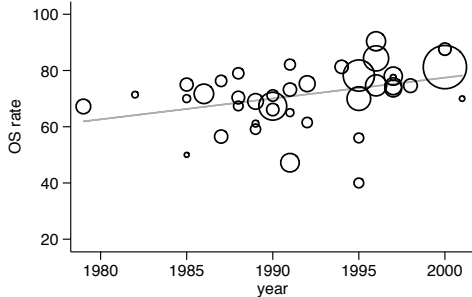**B. Asparaginase**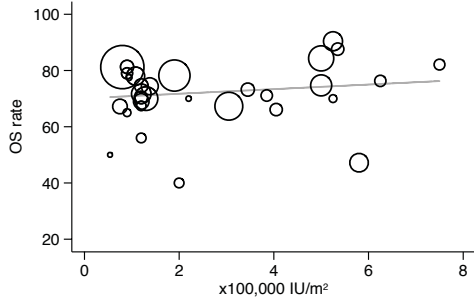**C. High-dose methotrexate**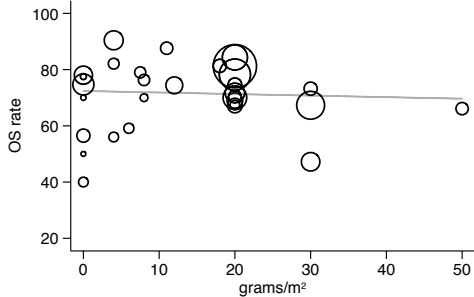**D. Anthracyclines**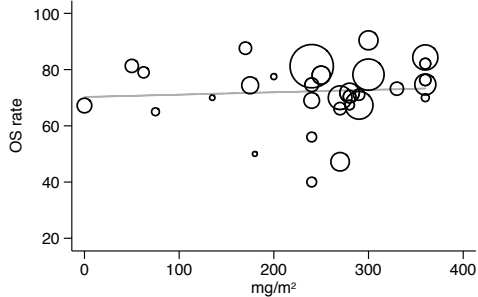

**Incidence of Relapse by Site for Studies That Reported Sites of Relapse**

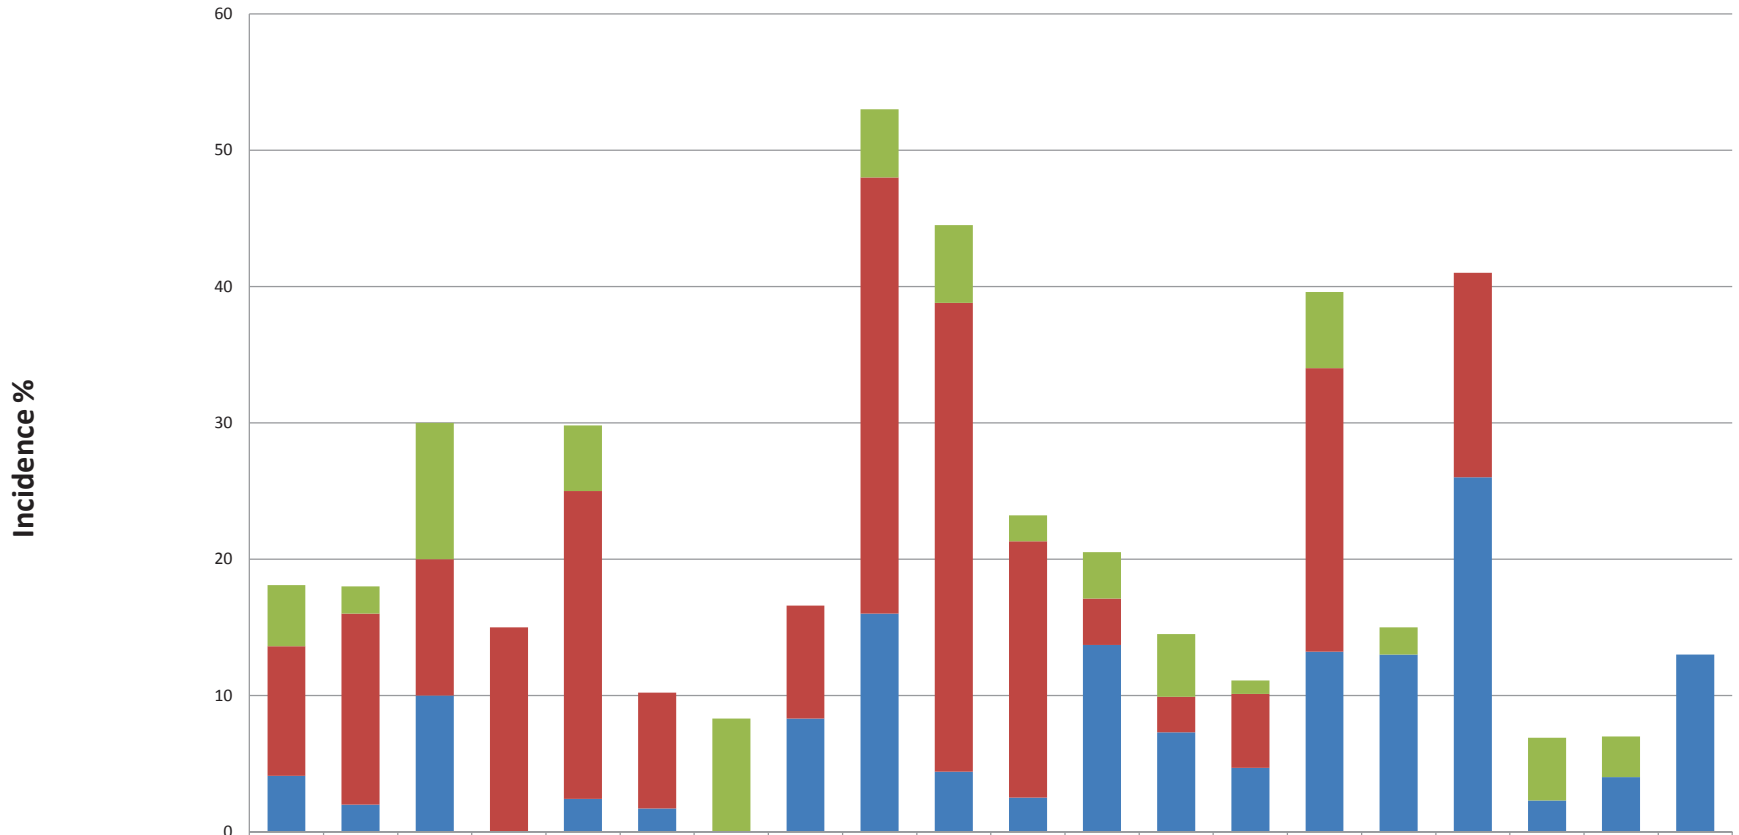

|                                   |    |    |    |    |    |   |   |   |    |    |    |    |   |   |    |    |    |   |   |    |
|-----------------------------------|----|----|----|----|----|---|---|---|----|----|----|----|---|---|----|----|----|---|---|----|
| ■ Combined CNS and marrow relapse | 5  | 2  | 10 | 0  | 5  | 0 | 8 | 0 | 5  | 6  | 2  | 3  | 5 | 1 | 6  | 2  |    | 5 | 3 | 0  |
| ■ Bone marrow relapse             | 10 | 14 | 10 | 15 | 23 | 9 | 0 | 8 | 32 | 34 | 19 | 3  | 3 | 5 | 21 |    | 15 |   |   | 0  |
| ■ CNS relapse                     | 4  | 2  | 10 | 0  | 2  | 2 | 0 | 8 | 16 | 4  | 3  | 14 | 7 | 5 | 13 | 13 | 26 | 2 | 4 | 13 |
